# Supplementary material for: Syndecan-1 promotes lung fibrosis by regulating epithelial reprogramming through extracellular vesicles
Source: JCI journal article supplement (doi:10.1172/jci.insight.129359), 2019-08-08
Supplement: sd6 [file 6]

## Sheet: Antibodies
Table 5.1 Antibodies.
Name	Source	Catalog
Phospho-Smad2 (Rabbit polyclonal)	Cell Signaling Technology	3108S
Smad2 (Rabbit polyclonal)	Cell Signaling Technology	D43B4
TGFβ-Receptor I (Rabbit polyclonal)	Abcam	ab31013
GAPDH (Rabbit polyclonal)	Cell Signaling Technology	14C10
Human syndecan-1 (mouse monoclonal)	AbD Serotec	MCA2459
Pre-diluated human syndecan-1 (mouse monoclonal)	Abcam	ab1410
Purified mouse syndecan-1 (Rat)	BD Biosciences	553712
Actin, ⍺-smooth muscle	Sigma-Aldrich	A5228
Purified anti-E-Cadherin (mouse)	BD Biosciences	610181
Muc5b (Rabbit polyclonal)	A gift from Christopher M Evans (co-author)
PE anti-mouse CD63	BioLegend	143904
APC anti-mouse F4/80	BioLegend	123116
PE/Cy7 anti-mouse CD45	BioLegend	103114
FITC-anti-mouse CD31	BioLegend	102406
Alexa Fluor 647-anti-mouse CD326 (Ep-CAM)	BioLegend	118212
Cell hashing antibodies	BioLegend	103159
HRP-conjugated IgG (Rabbit)	Cell Signaling Technology	7074
Alexa Fluoro-488 goat anti-mouse	Life Techonology	A28175
Alexa Fluoro-647 goat anti-rabbit	Life Techonology	A27040

## Sheet: Recombinant proteins
Table 5.2 Recombinant proteins.
Names	Source	Catalog
Recombinant human TGFβ-1	R&D System	240-B-010
Recombinant human Wnt3a	R&D System	5036-WN-010
Recombinant mouse Wnt3a	Prepotech	315-20

## Sheet: Oligonucleotides
Table 5.3 Oligonucleotides.
Primer ID	sense (5'-3')	antisense (3'-5')
col1a1	TTCTCCTGGCAAAGACGGAC	CCATCGGTCATGCTCTCTCC
acta2	CGGGCATCCACGAAACCA	ACGCTCTCAAATACCCCGTTT
fn1	TGACCCTTACACGGTTTCCC	TAGCGGCATGAAGCACTCAA
ctgf	AAAGAAACAAAGCACCAGGCAG	GGTGGCGATAGAGAGCACAA
